# Supplementary material
Source: PubMed Central journal article supplement (PMC7229756)
Supplement: pnas.2002146117.sapp.pdf [file pnas.2002146117.sapp.pdf]

Supplementary Information for:

**Inner ear sensory system changes as extinct crocodylomorphs transitioned from land to water**

Julia A. Schwab<sup>a,\*</sup>, Mark T. Young<sup>a</sup>, James M. Neenan<sup>b</sup>, Stig A. Walsh<sup>a,c</sup>, Lawrence M. Witmer<sup>d</sup>, Yanina Herrera<sup>e</sup>, Ronan Allain<sup>f</sup>, Christopher A. Brochu<sup>g</sup>, Jonah N. Choiniere<sup>h</sup>, James M. Clark<sup>i</sup>, Kathleen N. Dollman<sup>h,j</sup>, Steve Etches<sup>k</sup>, Guido Fritsch<sup>l</sup>, Paul M. Gignac<sup>m</sup>, Alexander Ruebenstahl<sup>n</sup>, Sven Sachs<sup>o</sup>, Alan H. Turner<sup>p</sup>, Patrick Vignaud<sup>q</sup>, Eric W. Wilberg<sup>p</sup>, Xu Xing<sup>r</sup>, Lindsay E. Zanno<sup>s,t</sup> & Stephen L. Brusatte<sup>a,c</sup>

<sup>a</sup>School of GeoSciences, Grant Institute, James Hutton Road, The King's Buildings, University of Edinburgh, Edinburgh, EH9 3FE, UK; <sup>b</sup>Oxford University Museum of Natural History, Oxford, OX1 3PW, United Kingdom; <sup>c</sup> Department of Natural Sciences, National Museum of Scotland, National Museum of Scotland, Chambers Street, Edinburgh, EH 1 1JF, UK; <sup>d</sup>Department of Biomedical Sciences, Heritage College of Osteopathic Medicine, Ohio University, Athens, Ohio 45701, USA; <sup>e</sup>Consejo Nacional de Investigaciones Científicas y Técnicas, División Paleontología Vertebrados, Museo de La Plata, FCNyM, UNLP National University of La Plata, La Plata, Argentina; <sup>f</sup> Centre de Recherche sur la Paléobiodiversité et les Paléoenvironnements, Muséum National d'Histoire Naturelle, CP 38, 8 rue Buffon, 75005 Paris, France; <sup>g</sup>Department of Earth and Environmental Sciences, University of Iowa, Iowa City, Iowa 52242, USA; <sup>h</sup>Evolutionary Studies Institute, University of the Witwatersrand, Johannesburg 2000, South Africa; <sup>i</sup>Department of Biological Sciences, George Washington University, Washington DC 20052, USA; <sup>j</sup>School of Geosciences, University of the Witwatersrand, Johannesburg 2000, South Africa;

<sup>k</sup>Museum of Jurassic Marine Life, Kimmeridge, BH20 5PE, UK; <sup>l</sup>Department of Reproduction Management, Leibniz Institute for Zoo and Wildlife Research, 10315 Berlin, Germany; <sup>m</sup>Department of Anatomy and Cell Biology, Oklahoma State University Center for Health Sciences, Tulsa, Oklahoma 74107, USA; <sup>n</sup>Department of Geology and Geophysics, Yale University, New Haven, CT 06511, USA; <sup>o</sup>Abteilung Geowissenschaften, Naturkunde-Museum Bielefeld, Naturkunde-Museum Bielefeld, Abteilung Geowissenschaften, Adenauerplatz 2, 33602 Bielefeld, Germany; <sup>p</sup>Department of Anatomical Sciences, Stony Brook University, Stony Brook, New York 11794, USA; <sup>q</sup> Laboratoire de Paléontologie, Evolution, Paléoécosystèmes et Paléoprimatologie, CNRS UMR 7262, Department of Geosciences, University of Poitiers, France; <sup>r</sup>Institute of Vertebrate Paleontology & Paleoanthropology, Chinese Academy of Sciences, Beijing, China; <sup>s</sup>Paleontology, North Carolina Museum of Natural Sciences, Raleigh, NC 27601, USA; <sup>t</sup>Department of Biological Sciences, North Carolina State University, Raleigh, NC 27695, USA

\* Correspondence: [julia.schwab@ed.ac.uk](mailto:julia.schwab@ed.ac.uk)

1. Specimens examined
2. Geometric morphometric analysis
3. Principal component analysis
4. Morphospace clustering analysis
5. Canonical variate analysis
6. Phylogenies used for phylogenetic comparative methods
7. Pagel's Lambda analysis
8. pGLS regressions
9. Labyrinth character optimization on phylogeny
10. Evolutionary model fitting
11. Evolutionary rates
12. Cochlear measurements
13. Inclusion of *Crocodylus porosus* juvenile
14. Left-right ear asymmetry
15. Supplementary References

## 1. Specimens Examined

**Table S1.** Detailed information on the specimens we scanned; their museum specimen numbers, ages, and CT scanning parameters. The abbreviations are the notations used in the Figures in the main text and the Supplementary Tables.

| Taxa                                              | ID                | Abbr. | voxel size (mm)      | facility                                                                                                         |
|---------------------------------------------------|-------------------|-------|----------------------|------------------------------------------------------------------------------------------------------------------|
| <i>Junggarsuchus sloani</i>                       | IVPP V14010       | JuSl  | 0.13                 | Institute of Vertebrate Paleontology and Paleoanthropology (IVPP) of the Chinese Academy of Sciences             |
| Undescribed sphenosuchian                         | NCSM 21722        | UnSp  | 0.039327             | Nikon XTH 225 ST $\mu$ CT scanner, Shared Materials Instrumentation Facility, Duke University, Durham, NC        |
| <i>Eopneumatosuchus colberti</i>                  | MNA V2460         | EoCo  | 0.092                | General Electric eXplore Locus in vivo Small Animal $\mu$ CT scanner, Ohio University $\mu$ CT Scanning Facility |
| <i>Protosuchus haughtoni</i>                      | BP/1/4770         | PrHa  | 0.0538               | Nikon Metrology XTH 225/320 LC dual source industrial CT system, University of the Witwatersrand, Johannesburg   |
| ' <i>Steneosaurus</i> ' cf. <i>gracilirostris</i> | NHMUK PV OR 33095 | StGr  | 0.089                | Nikon XT H 225S CTsystem, Natural History Museum, London                                                         |
| <i>Steneosaurus bollensis</i>                     | BSPG 1984 I258    | StBo1 | 0.043                | Nanotom Scan, Zoologische Staatssammlung München                                                                 |
| <i>Steneosaurus bollensis</i>                     | MCZ 1063          | StBo2 | 0.404297             | micro CT scanner at the American Museum of Natural History                                                       |
| <i>Steneosaurus pictaviensis</i>                  | LPP.M.35          | StPi  | 0.140036             | RX-solutions EasyTom XL Duo, Plateforme de Microtomographie, University of Poitiers                              |
| <i>Pelagosaurus typus</i>                         | NHMUK PV OR 32599 | PtTy  | 0.098627983          | Nikon XT H 225S CTsystem, Natural History Museum, London                                                         |
| <i>Metriorhynchus superciliosus</i>               | MNHN.F RJN 256    | MeSu1 | 0.10358673X<br>0.265 | Muséum national d'Histoire naturelle, Paris, France                                                              |
| <i>Metriorhynchus superciliosus</i>               | NHMUK PV R11999   | MeSu2 | 0.12                 | $\mu$ -VIS X-Ray Imaging Centre, University of Southampton                                                       |
| <i>Metriorhynchus superciliosus</i>               | AMNH 997          | MeSu3 | 0.14177665           | micro CT scanner at the American Museum of Natural History                                                       |
| <i>Cricosaurus araucanensis</i>                   | MLP 72-IV-7-1     | CrAu1 | 0.448X0.448          | SNSB X-ray facility                                                                                              |
| <i>Cricosaurus araucanensis</i>                   | MLP 76-XI-19-1    | CrAu2 | 0.39                 | SNSB X-ray facility                                                                                              |
| <i>Cricosaurus schroederi</i>                     | MMGLV #           | CrSc  | 0.5                  | Leibniz Institute for Zoo and Wildlife Research, Berlin                                                          |
| ' <i>Metriorhynchus</i> ' <i>brachyrhynchus</i>   | NHMUK PV OR 32618 | MeBr  | 0.0546               | $\mu$ -VIS X-Ray Imaging Centre, University of Southampton                                                       |
| <i>Torvoneustes coryphaeus</i>                    | MJML K1863        | ToCo  | 0.2267               | $\mu$ -VIS X-Ray Imaging Centre, University of Southampton                                                       |
| <i>Shamosuchus djadochtaensis</i>                 | IGM 100-1195      | ShDj  | 0.011260684          | micro CT scanner at the American Museum of Natural History                                                       |
| <i>Alligator mississippiensis</i>                 | USNM 211232       | AlMi4 | 0.625                | Ohio Health O'Bleness Hospital                                                                                   |
| <i>Alligator mississippiensis</i>                 | USNM 211233       | AlMi5 | 0.625                | Ohio Health O'Bleness Hospital                                                                                   |
| <i>Alligator mississippiensis</i>                 | OUVG 9761         | AlMi6 | 0.5X1                | Ohio Health O'Bleness Hospital                                                                                   |
| <i>Caiman crocodilus</i>                          | FMNH 73711        | CaCr  | 0.065X0.142          | University of Texas, Austin                                                                                      |
| <i>Crocodylus acutus</i>                          | FMNH 59071        | CrAc  | 0.625                | Ohio Health O'Bleness Hospital                                                                                   |
| <i>Crocodylus johnstoni</i>                       | TMM M-6807        | CrJo  | 0.223                | University of Texas High-Resolution X-ray CT Facility                                                            |
| <i>Crocodylus moreletii</i>                       | TMM M-4980        | CrMo  | 0.1904X0.5           | High-Resolution X-ray CT Facility, University of Texas                                                           |
| <i>Crocodylus rhombifer</i>                       | MNB AB50.0171     | CrRh  | 0.1748X0.5           | High-Resolution X-ray CT Facility, University of Texas                                                           |
| <i>Mecistops cataphractus</i>                     | TMM M-3529        | CrCa  | 0.165X0.5            | High-Resolution X-ray CT Facility, University of Texas                                                           |
| <i>Gavialis gangeticus</i>                        | UF-herp-118998    | GaGa2 | 0.14654672           | Florida Museum of Natural History Herpetology                                                                    |
| <i>Gavialis gangeticus</i>                        | TMM M-5490        | GaGa1 | 0.228                | High-Resolution X-ray CT Facility, University of Texas                                                           |
| <i>Osteolaemus tetraspis</i>                      | FMNH 98936        | OsTe  | 0.0546875X0.1108     | High-Resolution X-ray CT Facility, University of Texas                                                           |
| <i>Tomistoma schlegelii</i>                       | TMM M-6342        | ToSc1 | 0.165X0.46           | High-Resolution X-ray CT Facility, University of Texas                                                           |
| <i>Tomistoma schlegelii</i>                       | USNM 211322       | ToSc2 | 0.625                | Ohio Health O'Bleness Hospital                                                                                   |

**Table S2.** Information of the habitat (ecomorphology) and age of each species used in our sample.

| Taxa                                            | habitat     | Age           | Reason                                                                         | Reference  |
|-------------------------------------------------|-------------|---------------|--------------------------------------------------------------------------------|------------|
| <i>Junggarsuchus sloani</i>                     | terrestrial | M. Jurassic   | Inferred, from deposit, and limb-dimensions and cranial shape                  | 1          |
| Undescribed sphenosuchian                       | terrestrial | Carnian       | Inferred, from deposit, and limb-dimensions and cranial shape                  | NCSM 21722 |
| <i>Eopneumatosuchus colberti</i>                | semiaquatic | Sinemurian*   | Inferred, from deposit and cranial shape                                       | 2          |
| <i>Protosuchus haughtoni</i>                    | terrestrial | Hettangian    | Inferred, from post-cranial skeleton                                           | 3          |
| ' <i>Steneosaurus</i> ' <i>gracilirostris</i>   | semiaquatic | Toarcian      | Inferred, from a marine deposit, but has extant-like limbs, and has osteoderms | 4          |
| <i>Steneosaurus bollensis</i>                   | semiaquatic | Toarcian      | Inferred, from a marine deposit, but has extant-like limbs, and has osteoderms | 4          |
| <i>Steneosaurus pictaviensis</i>                | semiaquatic | Toarcian      | Inferred, from a marine deposit and is a teleosaurid                           | 5          |
| <i>Pelagosaurus typus</i>                       | semiaquatic | Toarcian      | Inferred, from a marine deposit, but has extant-like limbs, and has osteoderms | 4          |
| <i>Metriorhynchus superciliosus</i>             | pelagic     | Callovian     | Inferred, marine deposit, has flippers and a tail-fin                          | 5          |
| <i>Cricosaurus araucanensis</i>                 | pelagic     | Tithonian     | Inferred, marine deposit, has flippers and a tail-fin                          | 6, 7       |
| <i>Cricosaurus schroederi</i>                   | pelagic     | Valanginian   | Inferred, marine deposit and is a metriorhynchid                               | 8          |
| ' <i>Metriorhynchus</i> ' <i>brachyrhynchus</i> | pelagic     | Callovian     | Inferred, marine deposit and has a tail-fin                                    | 5          |
| <i>Torvoneustes coryphaeus</i>                  | pelagic     | Kimmeridgian  | Inferred, marine deposit and is a metriorhynchid                               | 9          |
| <i>Shamosuchus djadochtaensis</i>               | semiaquatic | L. Cretaceous | Inferred, based on post-cranial anatomy                                        | 10         |
| <i>Alligator mississippiensis</i>               | semiaquatic | Recent        | extant, observed                                                               | e.g. 11    |
| <i>Caiman crocodilus</i>                        | semiaquatic | Recent        | extant, observed                                                               | e.g. 11    |
| <i>Crocodylus acutus</i>                        | semiaquatic | Recent        | extant, observed                                                               | e.g. 11    |
| <i>Crocodylus johnstoni</i>                     | semiaquatic | Recent        | extant, observed                                                               | e.g. 11    |
| <i>Crocodylus moreletii</i>                     | semiaquatic | Recent        | extant, observed                                                               | e.g. 11    |
| <i>Crocodylus rhombifer</i>                     | semiaquatic | Recent        | extant, observed                                                               | e.g. 11    |
| <i>Mecistops cataphractus</i>                   | semiaquatic | Recent        | extant, observed                                                               | e.g. 11    |
| <i>Gavialis gangeticus</i>                      | semiaquatic | Recent        | extant, observed                                                               | e.g. 11    |
| <i>Osteolaemus tetraspis</i>                    | semiaquatic | Recent        | extant, observed                                                               | e.g. 11    |
| <i>Tomistoma schlegelii</i>                     | semiaquatic | Recent        | extant, observed                                                               | e.g. 11    |

\*The age of the Kayenta Formation may be Pliensbachian-Toarcian, as has been presented in a conference abstract (Marsh et al., 2014, Society of Vertebrate Paleontology Annual Meeting).

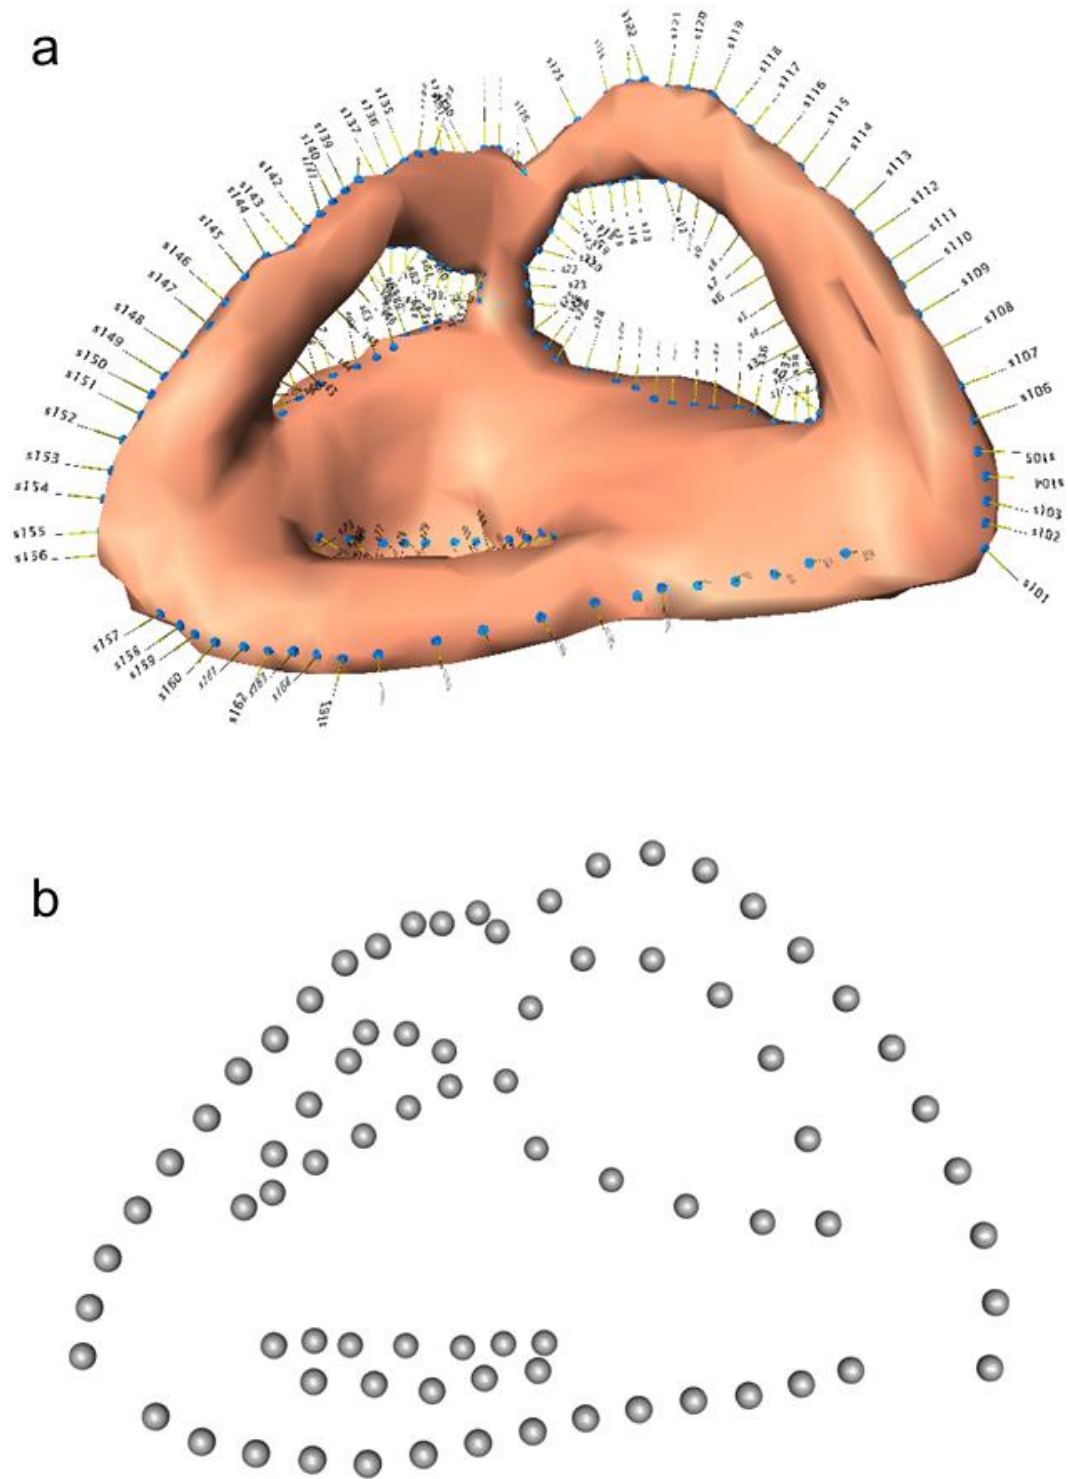

**Fig. S1.** Landmark placing on the right labyrinth of *Metriorhynchus superciliosus* (NHMUK PV R11999). a, landmark placement in the IDAV Landmark software; b, evenly spaced semilandmarks on the three semicircular canals, 11 on the internal surface and 12 on the external surface (see methods section for details).

### 3. Principal component analysis

**Table S3.** Results of the Principal Component Analysis. PCA coordinates for the first 31 PC axes.

|              | PC1    | PC2    | PC3    | PC4    | PC5    | PC6    | PC7    | PC8    |
|--------------|--------|--------|--------|--------|--------|--------|--------|--------|
| <b>AlMi4</b> | -0.025 | -0.024 | 0.035  | -0.038 | 0.013  | -0.002 | 0.009  | 0.000  |
| <b>AlMi5</b> | -0.022 | -0.050 | 0.025  | -0.044 | 0.000  | -0.007 | 0.010  | -0.003 |
| <b>CaCr</b>  | -0.051 | -0.043 | -0.011 | -0.037 | -0.025 | -0.001 | 0.010  | 0.028  |
| <b>CrAc</b>  | -0.016 | -0.056 | 0.015  | 0.025  | 0.022  | -0.030 | -0.020 | -0.006 |
| <b>CrMo</b>  | -0.061 | -0.021 | -0.019 | 0.013  | 0.011  | 0.012  | -0.014 | -0.004 |
| <b>CrJo</b>  | -0.059 | -0.003 | -0.004 | -0.059 | 0.012  | 0.000  | 0.012  | -0.028 |
| <b>CrCa</b>  | -0.014 | -0.085 | 0.022  | 0.047  | 0.011  | -0.023 | 0.005  | -0.004 |
| <b>OsTe</b>  | -0.030 | -0.002 | 0.049  | -0.003 | -0.035 | -0.044 | -0.012 | 0.034  |
| <b>GaGa1</b> | -0.028 | -0.056 | 0.054  | -0.006 | 0.004  | -0.008 | 0.005  | 0.004  |
| <b>ToSc1</b> | -0.051 | -0.069 | 0.013  | 0.027  | 0.013  | 0.014  | -0.007 | 0.014  |
| <b>ToSc2</b> | -0.022 | -0.071 | 0.035  | 0.025  | 0.009  | 0.027  | -0.017 | 0.021  |
| <b>GaGa2</b> | -0.032 | -0.010 | 0.058  | -0.023 | 0.037  | 0.028  | -0.019 | 0.005  |
| <b>AlMi6</b> | -0.038 | 0.013  | 0.028  | -0.045 | 0.001  | -0.011 | 0.042  | -0.030 |
| <b>CrRh</b>  | -0.033 | -0.053 | 0.002  | 0.039  | 0.001  | 0.036  | 0.001  | -0.005 |
| <b>PeTy</b>  | 0.014  | 0.084  | 0.028  | 0.006  | -0.043 | 0.010  | -0.016 | -0.002 |
| <b>JuSI</b>  | -0.115 | 0.019  | -0.064 | 0.031  | -0.033 | -0.056 | 0.012  | 0.002  |
| <b>MeSu2</b> | 0.057  | 0.015  | -0.016 | -0.041 | 0.038  | 0.003  | 0.048  | 0.032  |
| <b>StBo1</b> | 0.011  | 0.056  | 0.058  | 0.023  | -0.011 | 0.013  | -0.017 | 0.013  |
| <b>CrSc</b>  | 0.104  | -0.092 | -0.062 | -0.005 | -0.077 | 0.060  | -0.011 | -0.047 |
| <b>EoCo</b>  | -0.048 | 0.066  | -0.030 | 0.009  | 0.014  | 0.046  | -0.020 | -0.021 |
| <b>UnSp</b>  | -0.087 | 0.039  | -0.065 | -0.008 | -0.081 | -0.015 | 0.016  | 0.012  |
| <b>MeSu1</b> | 0.038  | 0.064  | -0.037 | -0.004 | 0.001  | 0.031  | 0.031  | 0.033  |
| <b>StBo2</b> | 0.014  | 0.097  | 0.059  | 0.018  | -0.012 | -0.024 | 0.006  | -0.056 |
| <b>StGr</b>  | 0.059  | 0.066  | 0.029  | 0.051  | -0.018 | 0.001  | 0.005  | 0.001  |
| <b>MeBr</b>  | 0.072  | 0.063  | -0.009 | 0.000  | 0.040  | -0.006 | 0.049  | 0.005  |
| <b>MeSu3</b> | 0.028  | 0.039  | -0.022 | 0.005  | -0.004 | 0.041  | 0.029  | 0.031  |
| <b>CrAu1</b> | 0.136  | 0.008  | 0.021  | -0.074 | -0.026 | -0.023 | -0.073 | 0.037  |
| <b>PrHa</b>  | -0.071 | 0.101  | -0.096 | -0.005 | 0.060  | -0.002 | -0.071 | -0.005 |
| <b>ToCo</b>  | 0.115  | -0.065 | -0.110 | 0.057  | 0.025  | -0.042 | 0.005  | 0.017  |
| <b>CrAu2</b> | 0.087  | -0.028 | -0.032 | -0.047 | 0.019  | -0.044 | -0.003 | -0.052 |
| <b>StPi</b>  | 0.073  | 0.031  | 0.068  | 0.069  | 0.005  | -0.011 | 0.002  | -0.013 |
| <b>ShDj</b>  | -0.003 | -0.035 | -0.025 | -0.007 | 0.027  | 0.025  | 0.002  | -0.016 |

|              | PC9    | PC10   | PC11   | PC12   | PC13   | PC14   | PC15   | PC16   |
|--------------|--------|--------|--------|--------|--------|--------|--------|--------|
| <b>AlMi4</b> | 0.028  | -0.006 | -0.019 | 0.014  | -0.035 | -0.013 | -0.002 | 0.039  |
| <b>AlMi5</b> | 0.016  | -0.002 | 0.026  | -0.018 | -0.009 | -0.018 | 0.008  | 0.008  |
| <b>CaCr</b>  | 0.008  | -0.005 | -0.012 | -0.020 | 0.014  | 0.003  | -0.024 | 0.008  |
| <b>CrAc</b>  | 0.042  | -0.010 | 0.014  | -0.023 | 0.040  | 0.005  | 0.015  | 0.002  |
| <b>CrMo</b>  | -0.023 | -0.018 | -0.003 | -0.014 | 0.011  | 0.015  | 0.006  | 0.005  |
| <b>CrJo</b>  | -0.030 | -0.022 | -0.008 | 0.022  | -0.004 | 0.008  | 0.026  | -0.013 |
| <b>CrCa</b>  | -0.032 | -0.010 | 0.024  | 0.005  | 0.012  | -0.010 | 0.023  | 0.001  |
| <b>OsTe</b>  | 0.012  | -0.040 | 0.003  | -0.001 | -0.022 | 0.034  | -0.015 | -0.012 |
| <b>GaGa1</b> | 0.014  | 0.018  | 0.010  | 0.004  | -0.002 | 0.007  | -0.001 | 0.006  |
| <b>ToSc1</b> | -0.013 | 0.017  | 0.005  | 0.006  | 0.010  | -0.017 | -0.003 | -0.005 |
| <b>ToSc2</b> | 0.032  | 0.013  | 0.006  | 0.024  | -0.020 | -0.036 | -0.005 | -0.026 |
| <b>GaGa2</b> | 0.008  | 0.028  | -0.012 | -0.011 | 0.014  | 0.026  | -0.015 | -0.013 |
| <b>AlMi6</b> | -0.002 | -0.034 | -0.017 | -0.022 | 0.009  | -0.024 | -0.022 | -0.017 |
| <b>CrRh</b>  | -0.025 | -0.015 | -0.004 | 0.017  | -0.006 | 0.018  | 0.004  | 0.024  |
| <b>PeTy</b>  | -0.017 | -0.014 | 0.002  | -0.011 | 0.007  | -0.022 | -0.013 | 0.015  |
| <b>JuSl</b>  | 0.005  | 0.045  | -0.053 | -0.014 | -0.010 | -0.003 | 0.027  | -0.004 |
| <b>MeSu2</b> | -0.023 | 0.009  | 0.024  | -0.006 | -0.015 | 0.008  | 0.026  | 0.009  |
| <b>StBo1</b> | -0.016 | 0.021  | 0.007  | -0.017 | -0.030 | 0.015  | 0.001  | -0.004 |
| <b>CrSc</b>  | 0.036  | -0.009 | -0.008 | -0.010 | -0.006 | 0.013  | 0.018  | -0.003 |
| <b>EoCo</b>  | -0.007 | 0.001  | 0.004  | -0.006 | -0.030 | -0.008 | -0.005 | -0.015 |
| <b>UnSp</b>  | -0.007 | 0.005  | 0.041  | 0.044  | 0.013  | 0.003  | -0.012 | -0.005 |
| <b>MeSu1</b> | 0.028  | 0.012  | -0.013 | 0.012  | 0.026  | -0.010 | -0.006 | 0.017  |
| <b>StBo2</b> | 0.006  | 0.012  | 0.013  | -0.009 | -0.002 | 0.012  | -0.003 | 0.008  |
| <b>StGr</b>  | -0.022 | -0.011 | 0.002  | -0.022 | 0.005  | -0.032 | 0.012  | -0.002 |
| <b>MeBr</b>  | 0.033  | -0.024 | -0.013 | 0.022  | 0.002  | 0.006  | 0.016  | -0.021 |
| <b>MeSu3</b> | -0.001 | 0.020  | 0.018  | -0.025 | 0.011  | 0.017  | 0.000  | -0.007 |
| <b>CrAu1</b> | -0.025 | 0.002  | -0.021 | 0.011  | 0.012  | -0.008 | 0.017  | -0.005 |
| <b>PrHa</b>  | 0.027  | -0.018 | 0.015  | 0.004  | 0.003  | -0.002 | 0.003  | 0.008  |
| <b>ToCo</b>  | -0.010 | -0.016 | -0.002 | -0.015 | -0.025 | 0.001  | -0.028 | -0.001 |
| <b>CrAu2</b> | -0.005 | 0.045  | 0.023  | 0.009  | 0.000  | -0.001 | -0.020 | 0.000  |
| <b>StPi</b>  | 0.011  | 0.001  | -0.020 | 0.040  | 0.012  | 0.011  | -0.006 | 0.005  |
| <b>ShDj</b>  | -0.048 | 0.004  | -0.031 | 0.011  | 0.016  | 0.002  | -0.023 | 0.000  |



|              | PC17   | PC18   | PC19   | PC20   | PC21   | PC22   | PC23   | PC24   |
|--------------|--------|--------|--------|--------|--------|--------|--------|--------|
| <b>AlMi4</b> | -0.013 | 0.000  | -0.005 | -0.001 | -0.005 | 0.018  | 0.002  | 0.002  |
| <b>AlMi5</b> | -0.012 | 0.000  | 0.018  | 0.009  | -0.003 | -0.006 | -0.015 | -0.015 |
| <b>CaCr</b>  | -0.011 | -0.008 | 0.008  | 0.001  | 0.033  | -0.004 | 0.002  | 0.011  |
| <b>CrAc</b>  | -0.007 | 0.007  | 0.006  | -0.007 | -0.002 | 0.007  | -0.009 | 0.013  |
| <b>CrMo</b>  | -0.011 | 0.010  | 0.004  | -0.004 | 0.004  | 0.001  | 0.009  | -0.019 |
| <b>CrJo</b>  | -0.004 | -0.002 | 0.016  | 0.011  | 0.001  | -0.011 | 0.011  | 0.017  |
| <b>CrCa</b>  | 0.012  | -0.011 | -0.003 | -0.002 | 0.003  | 0.015  | 0.011  | 0.000  |
| <b>OsTe</b>  | 0.027  | 0.014  | -0.008 | -0.008 | -0.002 | -0.001 | -0.005 | 0.001  |
| <b>GaGa1</b> | 0.012  | -0.003 | 0.002  | 0.004  | -0.002 | -0.015 | -0.002 | -0.009 |
| <b>ToSc1</b> | -0.007 | 0.001  | -0.023 | -0.023 | 0.005  | -0.008 | 0.000  | 0.002  |
| <b>ToSc2</b> | -0.001 | 0.006  | 0.004  | 0.004  | -0.008 | -0.009 | 0.005  | 0.007  |
| <b>GaGa2</b> | 0.005  | -0.029 | -0.014 | 0.022  | -0.003 | 0.005  | 0.003  | -0.006 |
| <b>AlMi6</b> | 0.008  | 0.003  | -0.004 | -0.003 | -0.014 | 0.012  | 0.010  | -0.004 |
| <b>CrRh</b>  | 0.014  | 0.004  | 0.011  | 0.001  | -0.003 | -0.013 | 0.000  | -0.007 |
| <b>PeTy</b>  | 0.006  | 0.002  | -0.009 | 0.013  | -0.002 | -0.014 | -0.006 | 0.010  |
| <b>JuSl</b>  | 0.007  | 0.002  | 0.000  | 0.004  | -0.004 | -0.001 | -0.004 | -0.001 |
| <b>MeSu2</b> | 0.011  | -0.007 | -0.020 | -0.001 | 0.000  | 0.003  | -0.009 | 0.010  |
| <b>StBo1</b> | -0.026 | 0.021  | -0.006 | 0.000  | 0.006  | 0.006  | 0.016  | 0.002  |
| <b>CrSc</b>  | 0.002  | -0.001 | -0.015 | 0.002  | 0.000  | 0.002  | 0.001  | 0.001  |
| <b>EoCo</b>  | 0.017  | -0.015 | 0.019  | -0.018 | 0.015  | 0.013  | -0.013 | -0.001 |
| <b>UnSp</b>  | -0.015 | -0.009 | -0.005 | 0.005  | -0.004 | 0.010  | -0.003 | -0.005 |
| <b>MeSu1</b> | 0.021  | 0.000  | 0.007  | -0.012 | -0.002 | -0.003 | 0.017  | -0.003 |
| <b>StBo2</b> | -0.012 | -0.021 | 0.001  | -0.021 | -0.010 | -0.015 | 0.003  | 0.003  |
| <b>StGr</b>  | 0.006  | 0.002  | -0.006 | 0.016  | 0.011  | 0.001  | -0.003 | -0.007 |
| <b>MeBr</b>  | -0.017 | 0.004  | -0.009 | -0.003 | 0.013  | -0.010 | -0.005 | -0.012 |
| <b>MeSu3</b> | -0.004 | 0.014  | 0.022  | 0.002  | -0.017 | 0.006  | -0.002 | 0.006  |
| <b>CrAu1</b> | -0.004 | -0.009 | 0.009  | -0.011 | -0.006 | 0.002  | 0.000  | -0.006 |
| <b>PrHa</b>  | 0.002  | 0.006  | -0.011 | 0.009  | -0.003 | -0.002 | 0.003  | 0.001  |
| <b>ToCo</b>  | -0.011 | -0.018 | 0.007  | 0.005  | -0.008 | -0.005 | 0.005  | 0.002  |
| <b>CrAu2</b> | 0.017  | 0.023  | 0.001  | 0.003  | 0.013  | 0.001  | 0.005  | -0.003 |
| <b>StPi</b>  | 0.000  | 0.001  | 0.013  | 0.011  | 0.005  | 0.014  | -0.007 | 0.006  |
| <b>ShDj</b>  | -0.011 | 0.014  | -0.009 | -0.005 | -0.010 | 0.000  | -0.019 | 0.003  |

|              | PC25   | PC26   | PC27   | PC28   | PC29   | PC30   | PC31   |
|--------------|--------|--------|--------|--------|--------|--------|--------|
| <b>AlMi4</b> | -0.001 | -0.002 | -0.014 | 0.005  | 0.000  | 0.002  | 0.001  |
| <b>AlMi5</b> | 0.001  | -0.003 | 0.010  | -0.007 | 0.001  | -0.010 | 0.008  |
| <b>CaCr</b>  | 0.010  | -0.001 | 0.002  | 0.001  | -0.004 | -0.003 | -0.006 |
| <b>CrAc</b>  | -0.010 | -0.004 | 0.000  | 0.001  | 0.010  | 0.008  | -0.001 |
| <b>CrMo</b>  | -0.015 | -0.005 | -0.005 | -0.008 | -0.015 | 0.005  | -0.002 |
| <b>CrJo</b>  | -0.004 | -0.004 | -0.002 | 0.005  | 0.000  | 0.002  | 0.008  |
| <b>CrCa</b>  | 0.018  | 0.006  | -0.007 | -0.010 | 0.002  | -0.004 | 0.001  |
| <b>OsTe</b>  | 0.002  | -0.008 | -0.004 | -0.001 | -0.001 | -0.004 | 0.005  |
| <b>GaGa1</b> | 0.010  | 0.015  | 0.003  | 0.007  | -0.006 | 0.018  | 0.003  |
| <b>ToSc1</b> | -0.010 | 0.007  | -0.001 | 0.011  | -0.003 | -0.010 | 0.008  |
| <b>ToSc2</b> | 0.000  | -0.010 | -0.001 | -0.007 | -0.004 | 0.001  | -0.009 |
| <b>GaGa2</b> | -0.005 | -0.005 | -0.005 | -0.001 | 0.005  | -0.003 | 0.001  |
| <b>AlMi6</b> | -0.002 | 0.009  | 0.011  | 0.004  | 0.000  | -0.001 | -0.005 |
| <b>CrRh</b>  | -0.004 | 0.000  | 0.004  | 0.006  | 0.013  | -0.006 | -0.011 |
| <b>PeTy</b>  | -0.010 | 0.015  | -0.009 | -0.012 | 0.002  | 0.001  | 0.001  |
| <b>JuSl</b>  | 0.000  | 0.002  | 0.001  | -0.002 | 0.001  | -0.002 | -0.002 |
| <b>MeSu2</b> | -0.007 | -0.003 | 0.010  | -0.003 | -0.006 | 0.002  | -0.006 |
| <b>StBo1</b> | 0.002  | 0.004  | 0.012  | -0.003 | 0.009  | 0.004  | 0.003  |
| <b>CrSc</b>  | 0.003  | 0.001  | 0.003  | 0.000  | -0.003 | -0.001 | 0.002  |
| <b>EoCo</b>  | -0.004 | 0.004  | -0.002 | -0.001 | 0.003  | 0.005  | 0.002  |
| <b>UnSp</b>  | -0.003 | -0.002 | 0.001  | 0.002  | 0.003  | 0.004  | -0.001 |
| <b>MeSu1</b> | 0.000  | -0.009 | 0.005  | -0.006 | 0.004  | 0.002  | 0.008  |
| <b>StBo2</b> | 0.006  | -0.009 | -0.001 | -0.001 | -0.004 | -0.002 | -0.004 |
| <b>StGr</b>  | 0.004  | -0.017 | -0.003 | 0.014  | -0.001 | 0.003  | 0.001  |
| <b>MeBr</b>  | 0.003  | 0.008  | -0.009 | -0.003 | 0.007  | -0.001 | -0.003 |
| <b>MeSu3</b> | 0.006  | 0.007  | -0.013 | 0.007  | -0.006 | -0.006 | -0.001 |
| <b>CrAu1</b> | 0.000  | 0.003  | 0.001  | 0.002  | 0.001  | 0.000  | -0.004 |
| <b>PrHa</b>  | 0.011  | 0.003  | 0.006  | 0.003  | -0.004 | -0.004 | -0.001 |
| <b>ToCo</b>  | -0.005 | 0.002  | 0.001  | 0.001  | 0.001  | 0.002  | 0.003  |
| <b>CrAu2</b> | -0.005 | -0.002 | -0.006 | 0.000  | 0.002  | -0.003 | -0.002 |
| <b>StPi</b>  | -0.005 | 0.006  | 0.011  | 0.000  | -0.011 | -0.005 | 0.002  |
| <b>ShDj</b>  | 0.014  | -0.009 | 0.001  | -0.006 | 0.002  | 0.005  | 0.003  |

**Table S4.** Results of the Principal Component Analysis. Variance (%) and Cumulative Proportion (%) for the first 31 principal component axes.

|      | Variance (%) | Cumulative Proportion (%) |
|------|--------------|---------------------------|
| PC1  | 22.269       | 22.269                    |
| PC2  | 18.443       | 40.713                    |
| PC3  | 12.386       | 53.099                    |
| PC4  | 7.336        | 60.435                    |
| PC5  | 5.641        | 66.076                    |
| PC6  | 4.605        | 70.681                    |
| PC7  | 4.183        | 74.864                    |
| PC8  | 3.487        | 78.351                    |
| PC9  | 3.100        | 81.450                    |
| PC10 | 2.368        | 83.819                    |
| PC11 | 2.124        | 85.943                    |
| PC12 | 1.951        | 87.894                    |
| PC13 | 1.702        | 89.596                    |
| PC14 | 1.525        | 91.121                    |
| PC15 | 1.454        | 92.575                    |
| PC16 | 1.006        | 93.581                    |
| PC17 | 0.918        | 94.498                    |
| PC18 | 0.769        | 95.267                    |
| PC19 | 0.748        | 96.015                    |
| PC20 | 0.597        | 96.612                    |
| PC21 | 0.540        | 97.152                    |
| PC22 | 0.483        | 97.635                    |
| PC23 | 0.409        | 98.044                    |
| PC24 | 0.374        | 98.418                    |
| PC25 | 0.325        | 98.743                    |
| PC26 | 0.309        | 99.053                    |
| PC27 | 0.262        | 99.315                    |
| PC28 | 0.197        | 99.511                    |
| PC29 | 0.196        | 99.707                    |
| PC30 | 0.167        | 99.874                    |
| PC31 | 0.126        | 100.000                   |

#### 4. Morphospace clustering analysis

**Table S5.** Results of the PERMANOVA, to test if the three habitat groups are statistically significantly different from each other.

| pairs                              | F Model | R2    | p value | p adjusted |
|------------------------------------|---------|-------|---------|------------|
| <b>semiaquatic vs. terrestrial</b> | 4.875   | 0.223 | 0.002   | 0.003      |
| <b>semiaquatic vs. pelagic</b>     | 5.302   | 0.218 | 0.002   | 0.003      |
| <b>terrestrial vs. pelagic</b>     | 4.543   | 0.431 | 0.012   | 0.012      |

## 5. Canonical variate analysis

**Table S6.** Results for the canonical variate analysis (CVA). Showing the classification of the three habitat groups (pelagic, semiaquatic, terrestrial) with an overall classification accuracy of 100%.

|             | pelagic | semiaquatic | terrestrial |
|-------------|---------|-------------|-------------|
| pelagic     | 100     | 0           | 0           |
| semiaquatic | 0       | 100         | 0           |
| terrestrial | 0       | 0           | 100         |

overall classification accuracy: 100 %

|       | CV 1   | CV 2   |
|-------|--------|--------|
| AlMi4 | -1.033 | 0.846  |
| AlMi5 | -0.485 | 1.594  |
| CaCr  | -0.128 | -0.364 |
| CrAc  | -2.027 | 0.536  |
| CrMo  | -3.402 | 0.029  |
| CrJo  | -2.502 | -0.035 |
| CrCa  | -3.322 | 1.787  |
| OsTe  | -3.384 | -0.204 |
| GaGa1 | -2.031 | 1.215  |
| ToSc1 | -2.747 | 0.397  |
| ToSc2 | -1.644 | 0.679  |
| GaGa2 | -2.243 | 2.108  |
| AlMi6 | -2.406 | 2.322  |
| CrRh  | -3.277 | 1.411  |
| PeTy  | -1.567 | 0.197  |
| JuSI  | -1.680 | -7.193 |
| MeSu2 | 5.803  | 1.926  |
| StBo1 | -1.803 | 1.280  |
| CrSc  | 5.133  | 1.732  |
| EoCo  | -1.782 | -1.412 |
| UnSp  | 0.071  | -7.272 |
| MeSu1 | 5.550  | -1.380 |
| StBo2 | -2.583 | 0.189  |
| StGr  | -0.300 | 2.021  |
| MeBr  | 4.587  | 0.826  |
| MeSu3 | 4.047  | 0.695  |
| CrAu1 | 4.832  | 0.948  |
| PrHa  | -0.600 | -6.291 |
| ToCo  | 6.925  | -0.480 |
| CrAu2 | 5.415  | -0.885 |
| StPi  | -1.109 | 1.514  |
| ShDj  | -0.307 | 1.266  |

## 6. Phylogenies used for phylogenetic comparative methods

The main phylogenetic framework used herein is based on the results from Young *et al.* (12). This dataset (the ‘H+Y dataset’) is the latest in the ongoing Crocodylomorph SuperMatrix Project, a continuously updated dataset investigating the evolutionary relationships of crocodylomorph archosaurs. It was first presented in Ristevski *et al.* (13), and has been subsequently updated (e.g. 14–17). It is one of three datasets that form the core of the Crocodylomorph SuperMatrix Project, the other two also being presented in a modified form in Ósi *et al.* (14).

However, there are some taxa we use in our datasets that are known to have differing positions phylogenetically. The first of which is *Eopneumatosuchus colberti*. It has been recovered as the basal-most thalattosuchian in the ‘H+Y dataset’. However, in Young *et al.* (12), the position of *Eopneumatosuchus* can change depending on use of implied weighting or using Bayesian methods. In those analyses, *Eopneumatosuchus* is recovered as the sister taxon to Shartegosuchoidea + Mesoeucrocodylia. To test whether this second possible position of *Eopneumatosuchus* alters our result, we ran a series of sensitivity analyses with *Eopneumatosuchus* placed as the sister taxon to Thalattosuchia + (*Shamosuchus* + Crocodylia).

The second species we ran sensitivity analyses on was *Pelagosaurus typus*. While the more recent and large-sampled thalattosuchians phylogenetic datasets recover *Pelagosaurus* as the basal-most member of Metriorhynchoidea (papers using the ‘H+Y’ dataset, 18), some earlier datasets and pre-phylogenetic opinions considered *Pelagosaurus* to be a teleosauroid (e.g. 4, 19; although see Buffetaut (20) for a metriorhynchid-like opinion). We tested this alternate position of *Pelagosaurus* to see if it impacted upon our results.

There are also some competing hypotheses for the relationships of extant crocodylians in our dataset. In particular, there is no consensus on whether *Osteolaemus tetraspis* is more closely related to *Mecistops* or *Crocodylus*, in either molecular or morphological phylogenies (21). Additionally, the position of *Gavialis gangeticus* differs between molecular and morphological datasets. Molecular datasets recover *Gavialis* as the sister taxon to *Tomistoma* (being within Crocodylidae) – a position the Young *et al.* (12) dataset also recovers (e.g. 21, 22). However, most morphology-only datasets recover *Gavialis* as the basal-most living species, being the sister taxon to Alligatoridae + Crocodylidae (for further analyses and discussion see 23). However, as these both concern small nuances of the relationships of extant crocodylians—all of which have semiaquatic-type ears—these rearrangements would not affect our results.

## 7. Pagel's Lambda analysis

**Table S7.** Results for the phylogenetic influence tested with the Pagel's lambda tested for three different phylogenies: our primary phylogeny (first listed) and two alternative trees, for sensitivity analysis (see Section 6 above). 0 → no correlation between species; 1 → correlation between species equal to the Brownian expectation/the structure of the phylogeny alone can explain changes in traits.

### Primary phylogeny

|     | lambda  | logL   | logL0  | p value    |
|-----|---------|--------|--------|------------|
| PC1 | 0.99996 | 28.705 | 16.435 | 0.00000073 |
| PC2 | 0.69646 | 31.134 | 22.893 | 0.00004913 |
| PC3 | 0.99993 | 31.597 | 18.921 | 0.00000048 |

### *Eopneumatosuchus colberti* placed as the sister taxon to Thalattosuchia + (*Shamosuchus* + Crocodylia)

|     | lambda  | logL   | logL0  | p value |
|-----|---------|--------|--------|---------|
| PC1 | 0.77400 | 27.769 | 16.506 | 2E-06   |
| PC2 | 0.65831 | 30.953 | 22.949 | 6E-05   |
| PC3 | 0.99993 | 32.243 | 19.051 | 3E-07   |

### *Pelagosaurus typus* positioned as a teleosauroid

|     | lambda  | logL   | logL0  | p value |
|-----|---------|--------|--------|---------|
| PC1 | 0.77400 | 27.769 | 16.506 | 2E-06   |
| PC2 | 0.65831 | 30.953 | 22.949 | 6E-05   |
| PC3 | 0.99993 | 32.243 | 19.051 | 3E-07   |



## 8. pGLS regressions

**Table S8.** Results for Ordinary least squares (OLS) and phylogenetic generalised least squares (pGLS), using our primary phylogeny. First correlating the raw PC scores and centroid size (labyrinth size); second, correlating the raw PC scores and habitat; third correlating the residuals from the PC scores and centroid size with habitat.

### Primary phylogeny

| Model                 | Type | AICc    | intercept | p value | slope  | p value  | R2     |
|-----------------------|------|---------|-----------|---------|--------|----------|--------|
| PC1~centroid size     | OLS  | -61.319 | -4.706    | 0.111   | 4.662  | 0.112    | 0.071  |
|                       | pGLS | -78.643 | -5.078    | 0.034   | 4.993  | 0.035    | 0.111  |
| PC2~centroid size     | OLS  | -64.049 | -0.531    | 0.845   | 0.527  | 0.845    | -0.044 |
|                       | pGLS | -76.99  | 8.307     | 0.002   | -8.208 | 0.002    | 0.418  |
| PC3~centroid size     | OLS  | -88.324 | 7.205     | 0.0002  | -7.149 | 0.0002   | 0.451  |
|                       | pGLS | -81.948 | 5.787     | 0.011   | -5.751 | 0.011    | 0.315  |
| PC1~pelagic           | OLS  | -78.162 | -0.028    | 0.012   | 0.116  | 2.65e-05 | 0.559  |
|                       | pGLS | -70.159 | -0.035    | 0.370   | 0.083  | 0.042    | 0.385  |
| PC2~pelagic           | OLS  | -64.329 | 0.0033    | 0.81    | -0.016 | 0.59     | 0.013  |
|                       | pGLS | -60.347 | 0.002     | 0.974   | -0.060 | 0.222    | -0.165 |
| PC3~pelagic           | OLS  | -76.934 | 0.0035    | 0.734   | -0.046 | 0.056    | 0.156  |
|                       | pGLS | -68.628 | -0.031    | 0.445   | -0.050 | 0.226    | -0.193 |
| PC1.residuals~pelagic | OLS  | -72.660 | -0.019    | 0.110   | 0.089  | 0.00143  | 0.377  |
|                       | pGLS | -59.892 | 0.018     | 0.703   | 0.089  | 0.0005   | -0.061 |
| PC2.residuals~pelagic | OLS  | -64.505 | 0.004     | 0.769   | -0.019 | 0.522    | 0.019  |
|                       | pGLS | -49.136 | -0.038    | 0.522   | 0.007  | 0.801    | -0.861 |
| PC3.residuals~pelagic | OLS  | -88.418 | 0.001     | 0.895   | -0.005 | 0.773    | 0.004  |
|                       | pGLS | -68.295 | 0.003     | 0.940   | 0.008  | 0.847    | -1.304 |

**Table S9.** Results for phylogenetic generalised least squares (pGLS), using the two alternative phylogenies. First correlating the raw PC scores and centroid size (labyrinth size); second, correlating the raw PC scores and habitat; third correlating the residuals from the PC scores and centroid size with habitat.

***Eopneumatosuchus colberti* placed as the sister taxon to Thalattosuchia + (*Shamosuchus* + *Crocodylia*)**

| Model                 | Type | AICc    | intercept | p value | slope  | p value | R2     |
|-----------------------|------|---------|-----------|---------|--------|---------|--------|
| PC1~centroid size     | pGLS | -76.721 | -4.918    | 0.069   | 4.838  | 0.069   | 0.532  |
| PC2~centroid size     | pGLS | -77.183 | 7.885     | 0.005   | -7.790 | 0.005   | 0.422  |
| PC3~centroid size     | pGLS | -83.430 | 5.577     | 0.019   | -5.544 | 0.019   | 0.356  |
| PC1~pelagic           | pGLS | -70.159 | -0.035    | 0.370   | 0.083  | 0.042   | 0.385  |
| PC2~pelagic           | pGLS | -60.347 | 0.002     | 0.974   | -0.060 | 0.222   | -0.165 |
| PC3~pelagic           | pGLS | -68.628 | -0.031    | 0.445   | -0.049 | 0.226   | -0.192 |
| PC1.residuals~pelagic | pGLS | -55.657 | 0.009     | 0.859   | 0.092  | 0.001   | -0.266 |
| PC2.residuals~pelagic | pGLS | -47.624 | -0.032    | 0.594   | 0.013  | 0.666   | -0.983 |
| PC3.residuals~pelagic | pGLS | -70.355 | 0.003     | 0.939   | 0.011  | 0.544   | -1.114 |

***Pelagosaurus typus* positioned as a teleosauroid**

| Model                 | Type | AICc    | intercept | p value | slope  | p value | R2     |
|-----------------------|------|---------|-----------|---------|--------|---------|--------|
| PC1~centroid size     | pGLS | -80.371 | -5.328    | 0.023   | 5.230  | 0.024   | 0.598  |
| PC2~centroid size     | pGLS | -77.218 | 8.343     | 0.002   | -8.242 | 0.002   | 0.423  |
| PC3~centroid size     | pGLS | -82.687 | 5.655     | 0.012   | -5.627 | 0.012   | 0.336  |
| PC1~pelagic           | pGLS | -71.177 | -0.042    | 0.279   | 0.078  | 0.041   | 0.410  |
| PC2~pelagic           | pGLS | -60.562 | 0.0002    | 0.997   | -0.059 | 0.214   | -0.154 |
| PC3~pelagic           | pGLS | -69.841 | -0.038    | 0.345   | -0.052 | 0.174   | -0.134 |
| PC1.residuals~pelagic | pGLS | -55.436 | 0.008     | 0.887   | 0.089  | 0.001   | -0.278 |
| PC2.residuals~pelagic | pGLS | -48.265 | -0.039    | 0.536   | 0.007  | 0.809   | -0.930 |
| PC3.residuals~pelagic | pGLS | -70.095 | 0.004     | 0.916   | 0.005  | 0.782   | -1.137 |

## 9. Labyrinth character optimization on phylogeny

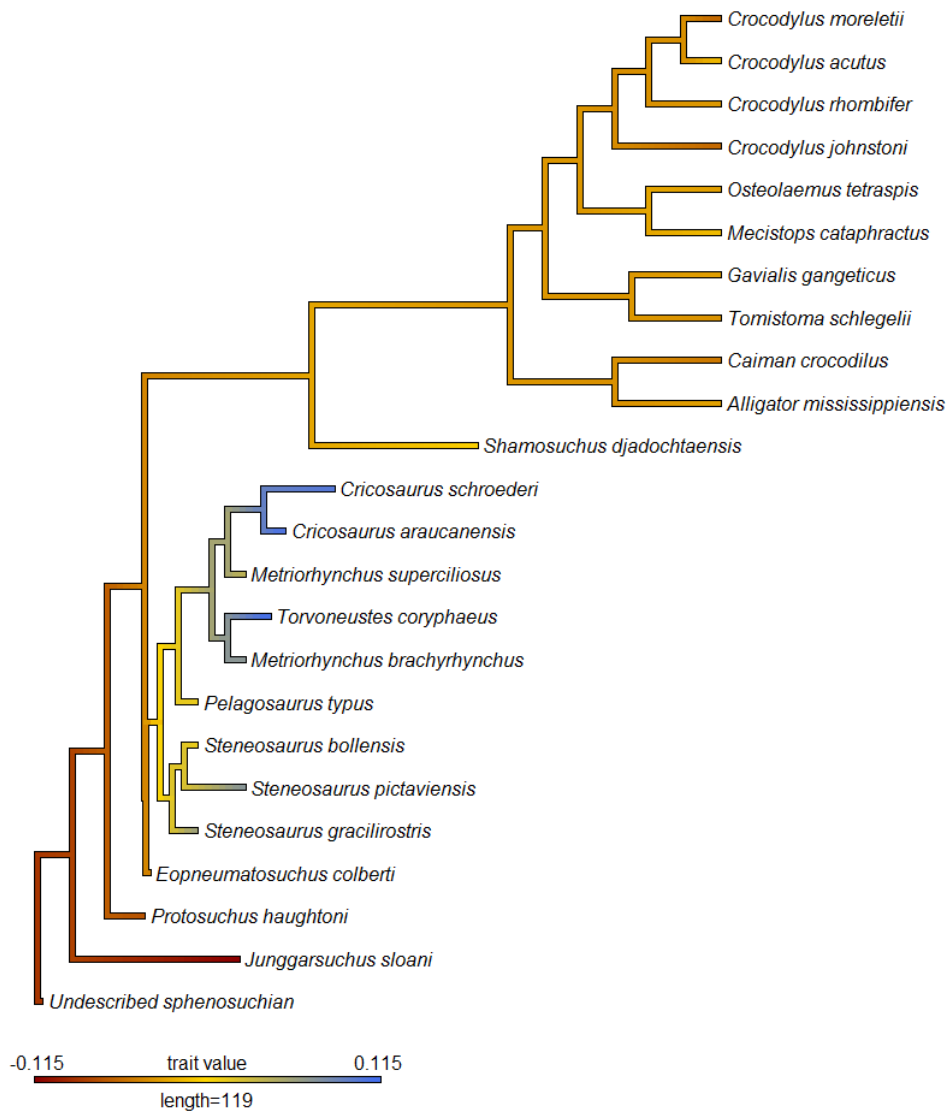

**Fig. S2.** PC1 scores optimized on our primary phylogeny to predict ancestral states for the major clades and assess evolutionary trends.

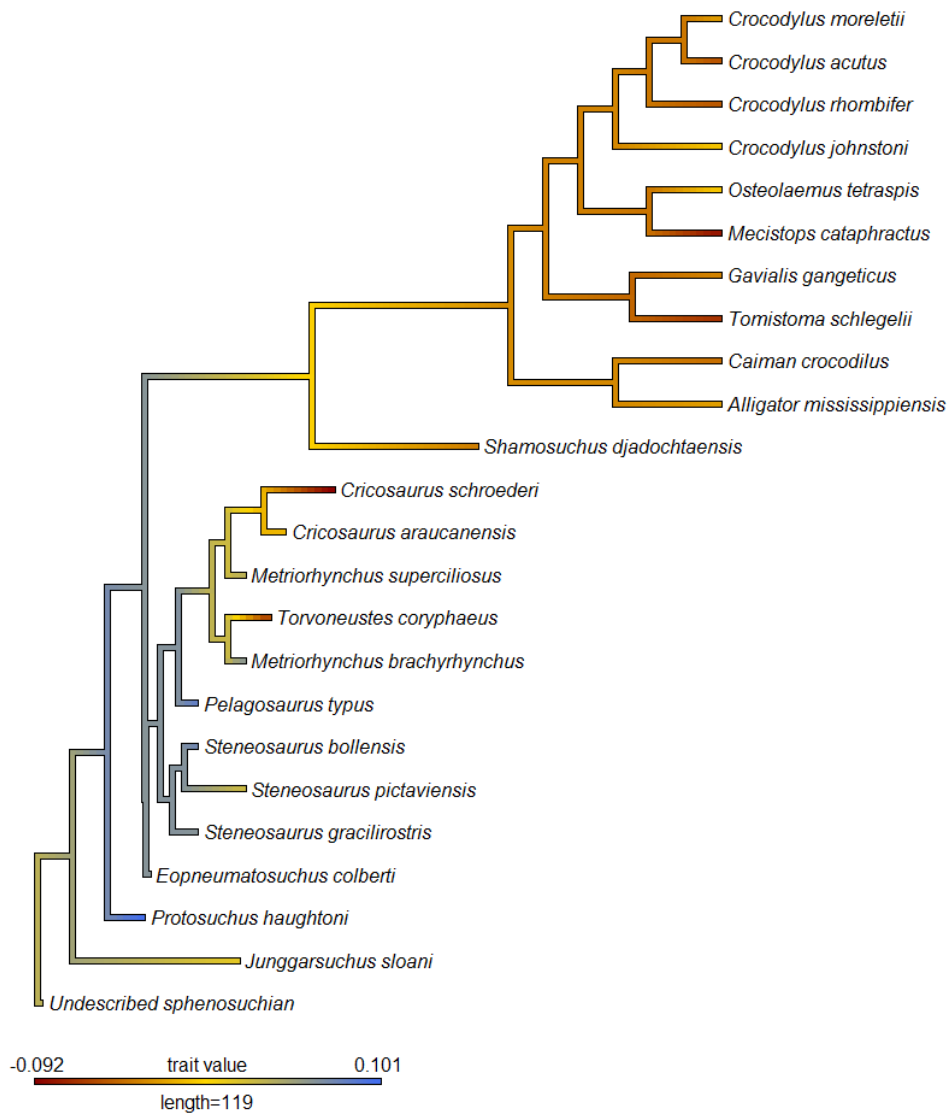

**Fig. S3.** PC2 scores optimized on our primary phylogeny to predict ancestral states for the major clades and assess evolutionary trends.

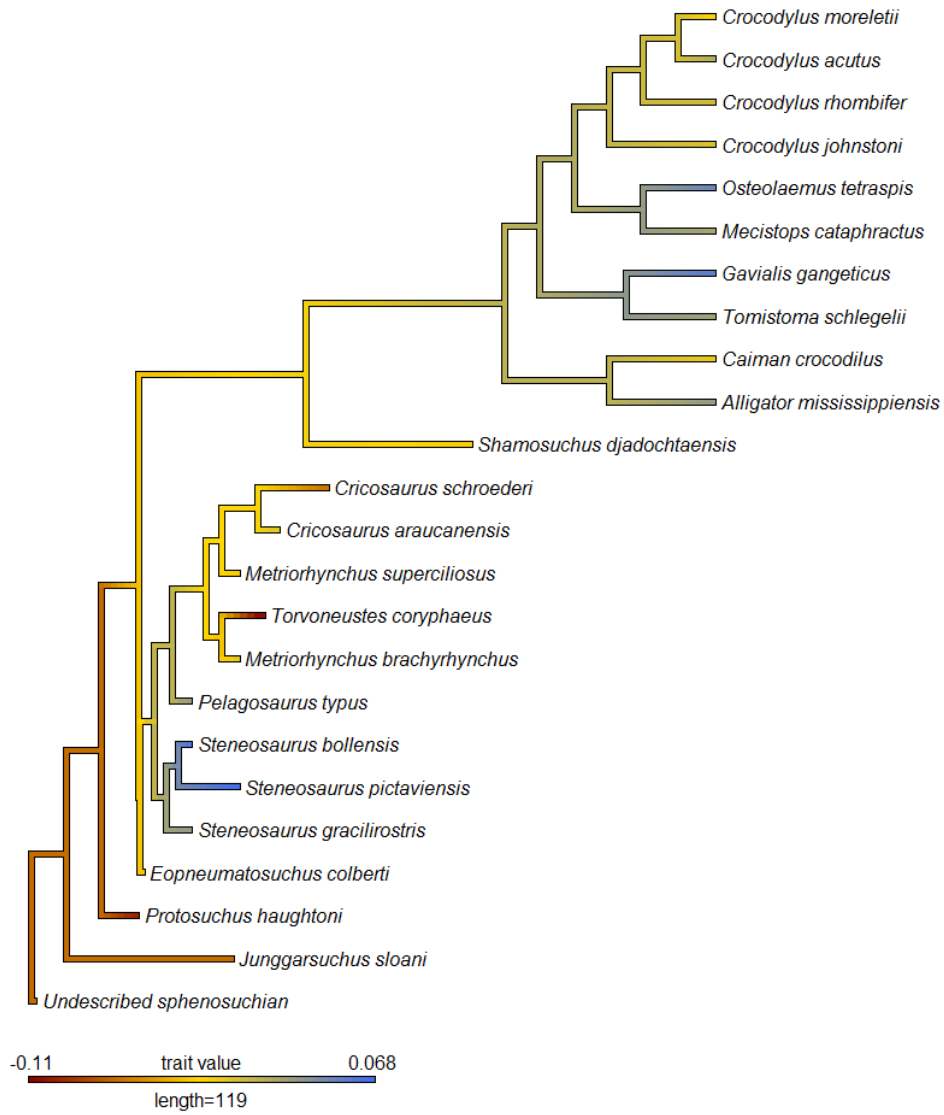

**Fig. S4.** PC3 scores optimized on our primary phylogeny to predict ancestral states for the major clades and assess evolutionary trends.

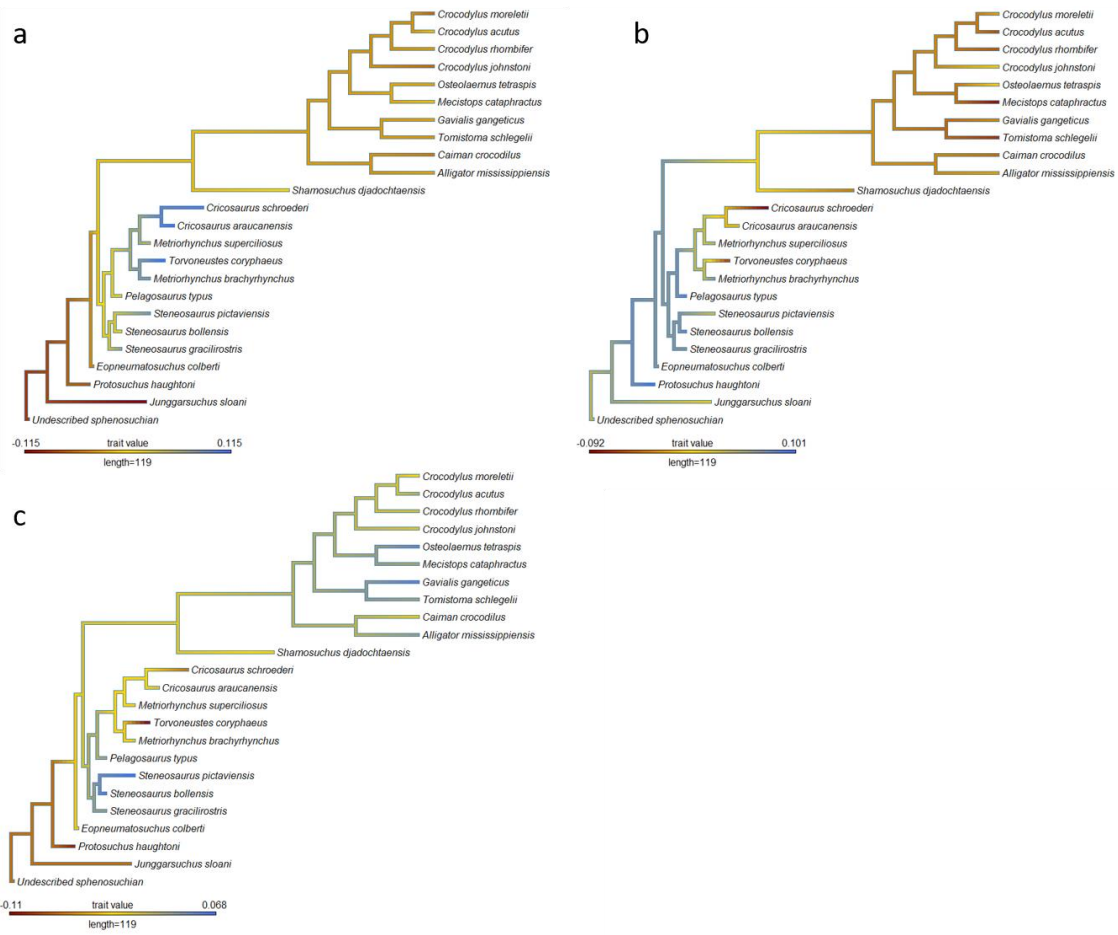

**Fig. S5.** PC scores of the first three principal components, optimized on the phylogeny with *Eopneumatosuchus colberti* placed as the sister taxon to Thalattosuchia + (*Shamosuchus* + *Crocodylia*), to predict ancestral states for the major clades and assess evolutionary trends. a, PC1; b, PC2; c, PC3.

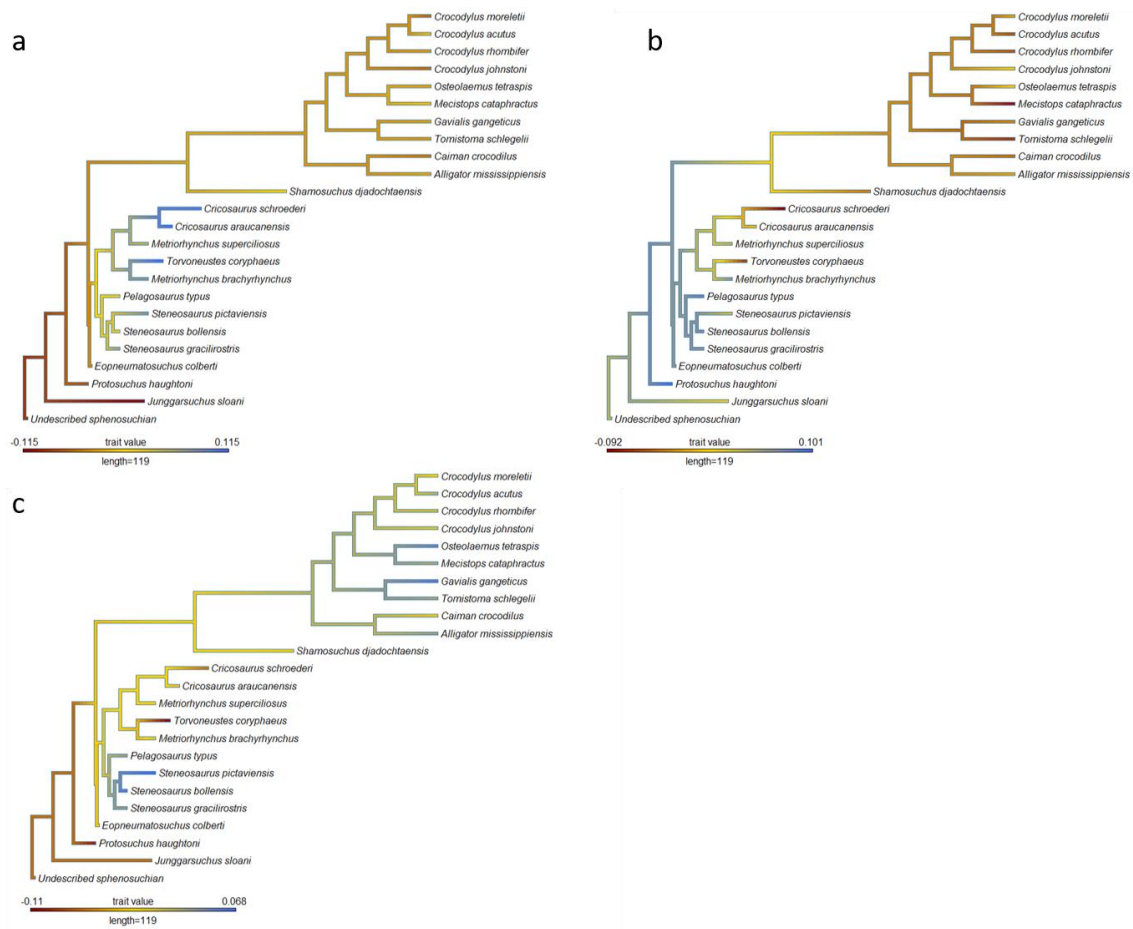

**Fig. S6.** PC3 scores optimized on the phylogeny with *Pelagosaurus typus* positioned as a teleosauroid, to predict ancestral states for the major clades and assess evolutionary trends. a, PC1; b, PC2; c, PC3.

## 10. Evolutionary model fitting

**Table S10.** Five standard models fitted on the first three principal component axes showing the AIC scores. The models are: BM (Brownian motion), OU (Ornstein-Uhlenbeck), EB (Early-burst), trend (Brownian motion with trend) and lambda (Pagel).

### Primary phylogeny

|     | BM      | OU      | EB      | trend   | lambda  |
|-----|---------|---------|---------|---------|---------|
| PC1 | -74.485 | -71.856 | -79.996 | -63.232 | -71.856 |
| PC2 | -69.521 | -68.680 | -69.084 | -64.574 | -67.822 |
| PC3 | -74.591 | -73.483 | -78.519 | -64.725 | -71.962 |

### Primary phylogeny (fossil specimens only)

|     | BM      | OU      | EB      | trend   | lambda  |
|-----|---------|---------|---------|---------|---------|
| PC1 | -36.607 | -33.298 | -33.297 | -39.191 | -33.305 |
| PC2 | -35.977 | -34.494 | -32.667 | -38.418 | -33.666 |
| PC3 | -42.606 | -40.841 | -39.524 | -36.884 | -39.297 |

*Eopneumatosuchus colberti* placed as the sister taxon to Thalattosuchia + (*Shamosuchus* + Crocodylia)

|     | BM      | OU      | EB      | trend   | lambda  |
|-----|---------|---------|---------|---------|---------|
| PC1 | -72.911 | -70.283 | -78.911 | -61.215 | -70.283 |
| PC2 | -72.719 | -71.107 | -71.698 | -67.207 | -70.091 |
| PC3 | -78.059 | -76.365 | -80.978 | -67.787 | -75.429 |

*Pelagosaurus typus* positioned as a teleosauroid

|     | BM      | OU      | EB      | trend   | lambda  |
|-----|---------|---------|---------|---------|---------|
| PC1 | -76.211 | -73.582 | -81.262 | -65.216 | -73.582 |
| PC2 | -69.629 | -68.789 | -69.289 | -64.601 | -67.825 |
| PC3 | -75.373 | -74.759 | -79.190 | -65.683 | -72.745 |



## 11. Evolutionary rates

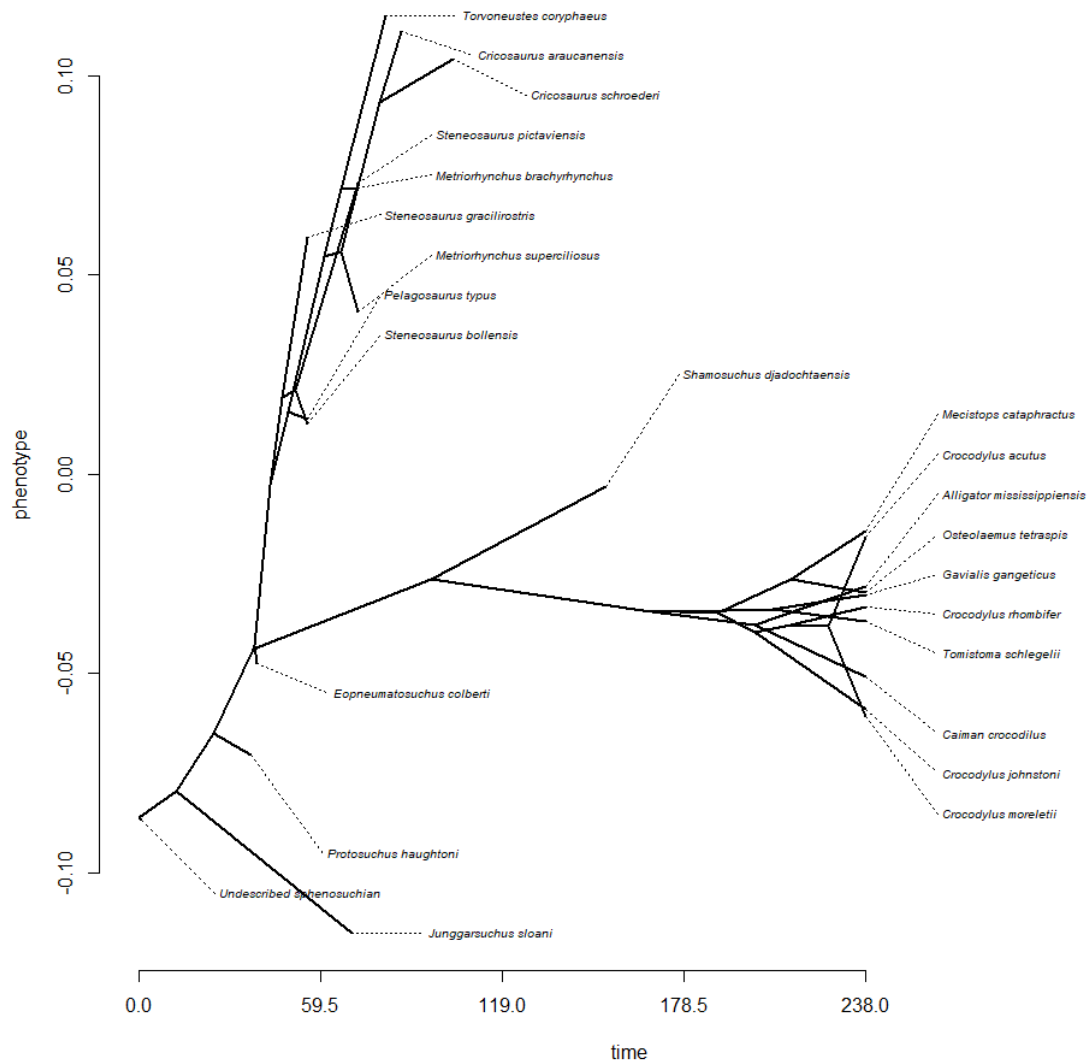

**Fig. S7.** The primary phylogeny is plotted such that the x-axis is scaled to time and the y-axis to PC1 score.

## 12. Cochlear measurements

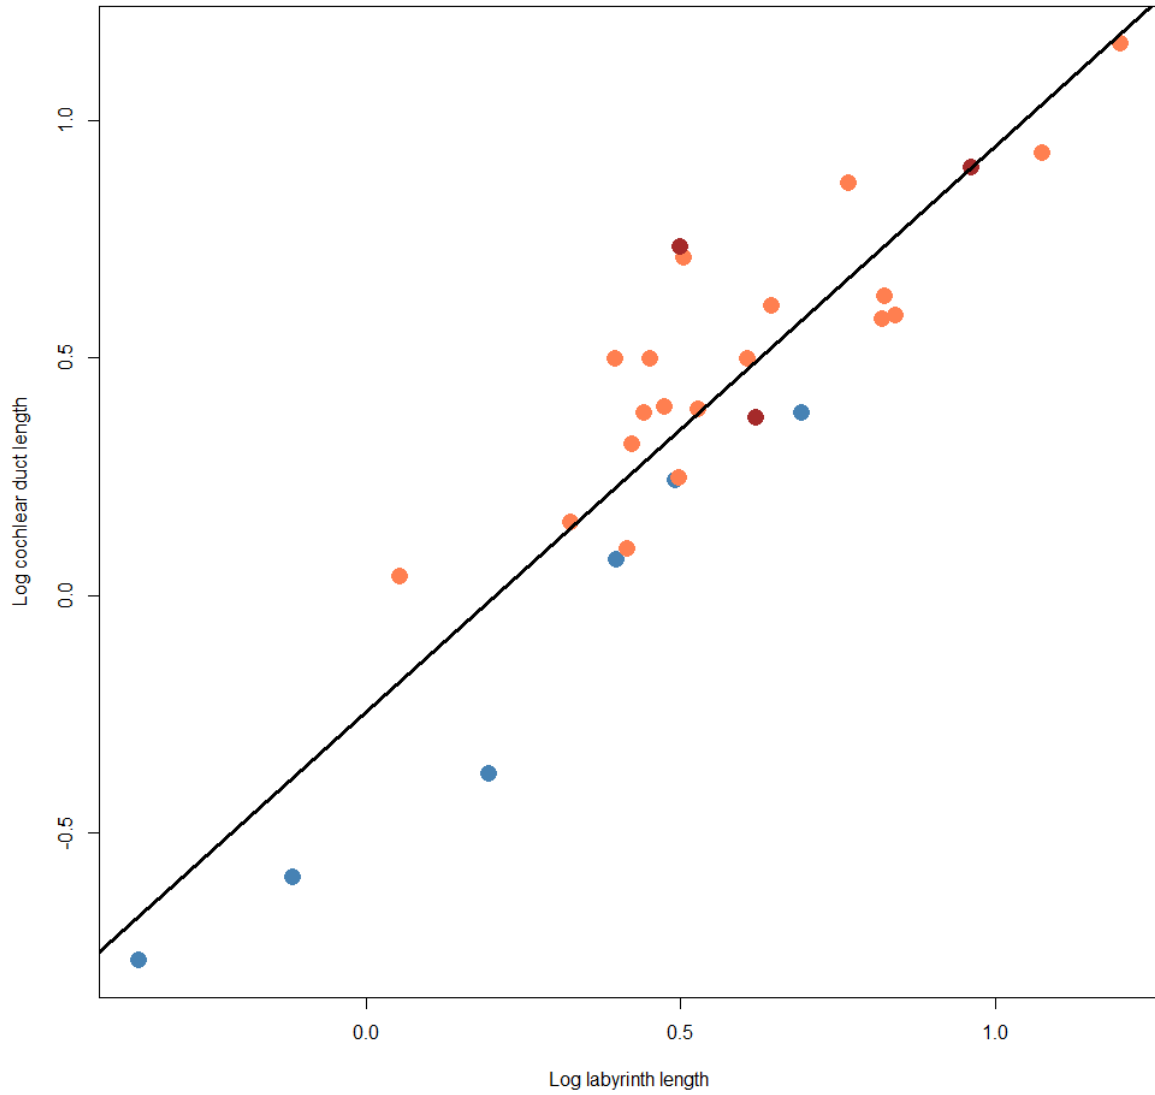

**Fig. S8.** Logarithmic plot of labyrinth length and cochlear duct length. Blue, pelagic; orange, semiaquatic; red, terrestrial.

### 13. Inclusion of *Crocodylus porosus* juvenile

The extant crocodylian *Crocodylus porosus* often ventures further offshore than other extant species. We do not include *C. porosus* in our dataset as the scan we acquired is of a juvenile, and we are limiting our analysis to adults. However, to demonstrate that *C. porosus* has an inner ear that is similar in shape to other extant crocodylians, and distinct in shape from pelagic extinct thalattosuchians, we provide an auxiliary analysis in which this juvenile specimen is included in our PCA morphospace below (analysis conducted following the same protocol as our primary PCA analysis, described above and in the main text). This demonstrates that the exclusion of *C. porosus* should not greatly affect our results, as its ear is exceedingly similar to the many other extant crocodylians in our dataset. We also acknowledge that extant species other than *C. porosus* are frequently encountered in brackish or saline environments, including one of the species in our analysis, *C. acutus*, and that swimming behavior in extant crocodylians appears to be the same whether an individual is in fresh or salt water. Hence, we wouldn't expect substantial differences in inner ear morphology between coastal and fluviolacustrine extant forms.

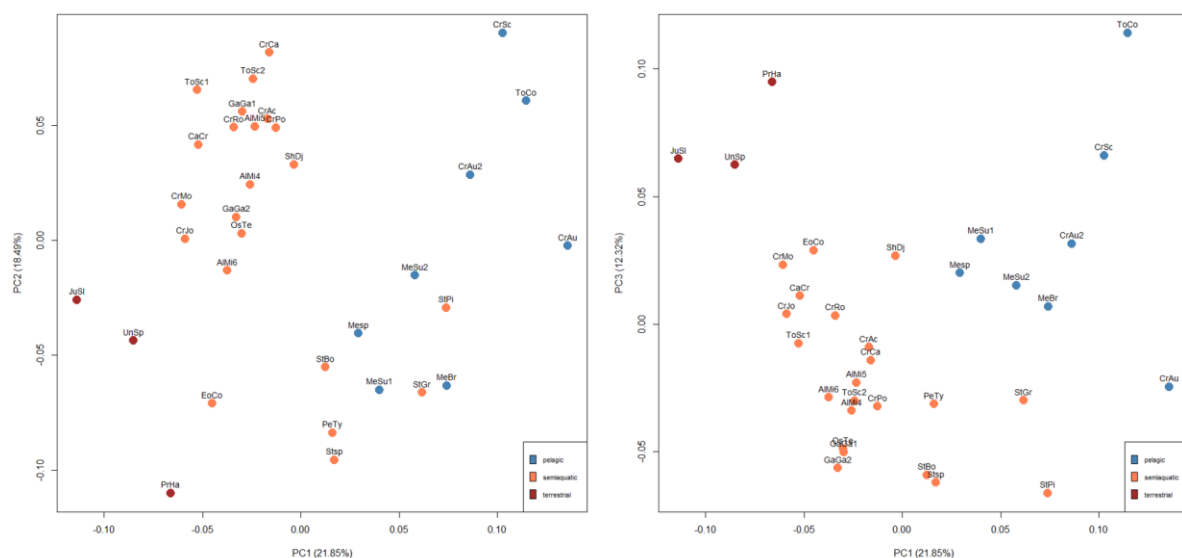

**Fig. S9.** PCA including the juvenile *Crocodylus porosus* (OUVC:10899; CrPo).

## 14. Left-Right Ear Asymmetry

To our knowledge, the only study testing whether left and right inner ear labyrinths of an archosaur are consistent in shape is a recent study of wild turkeys (24). The analyses in our paper use right labyrinths or mirrored left labyrinths. We here test whether mirrored left labyrinths resemble the shape of the right labyrinths in individuals of three key extant species, one from each major crocodylian subgroup. Importantly, we find that, for each individual, the mirrored left and actual right labyrinths fall out very close to each other in PCA morphospace (Fig. S10, analysis conducted following the same protocol as our primary PCA analysis, described above and in the main text), demonstrating that any asymmetry between left and right sides is minimal compared to the much greater amount of variation between species and between habitat groups. Thus, the inclusion of both right and mirrored left labyrinths in our dataset should not provide any serious bias. We visually show the actual left and right labyrinths of the three extant individuals in Fig. S11, which further demonstrates how similar in shape they are.

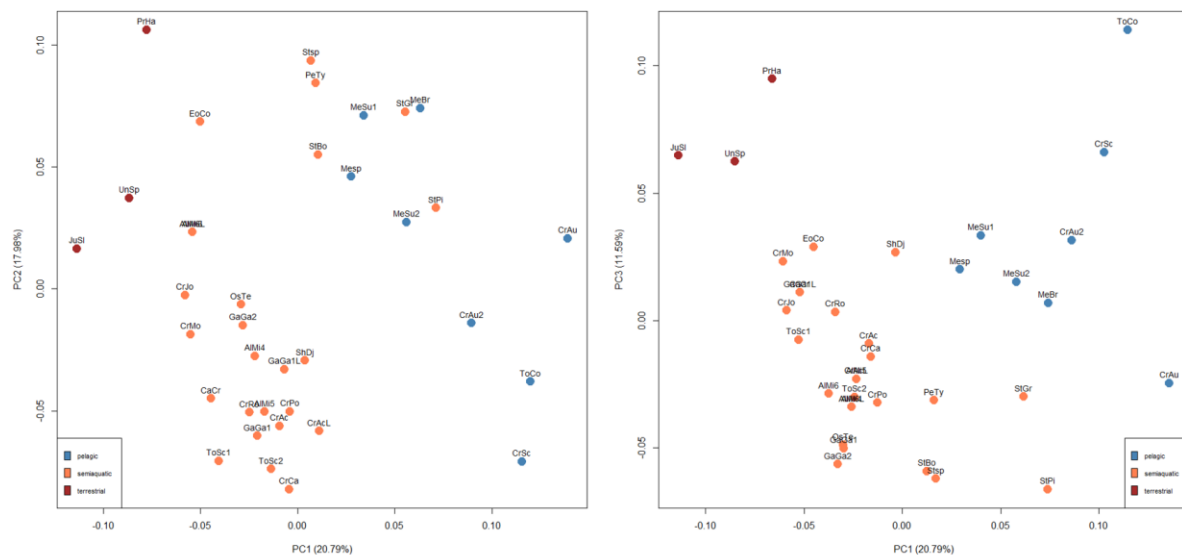

**Fig. S10.** PCA including the left mirrored labyrinths for *Alligator mississippiensis* (OUVC 9761; AIMi6L), *Crocodylus acutus* (FMNH 59071; CrAcL) and *Gavialis gangeticus* (TMM M-5490; GaGa1L).

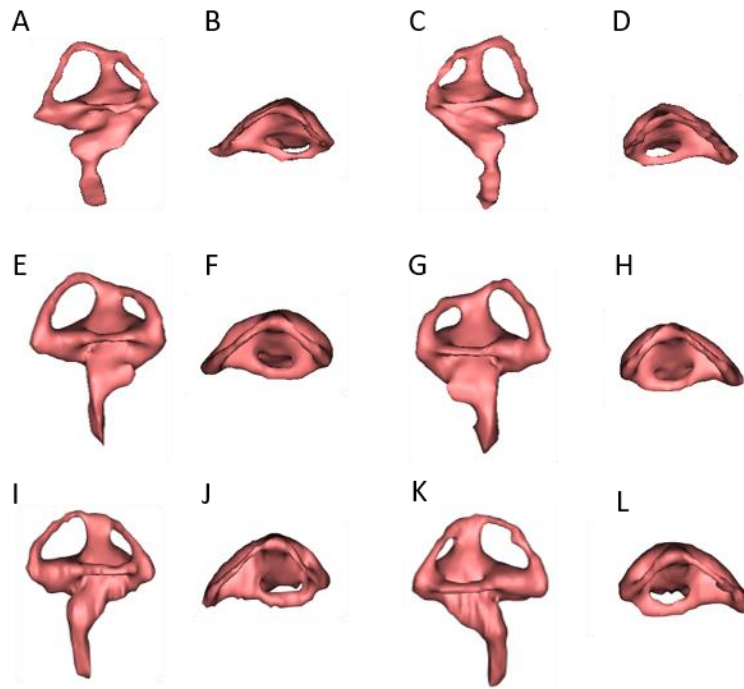

**Fig. S11.** Bony labyrinths of *Alligator mississippiensis* (OUVC 9761), *Crocodylus acutus* (FMNH 59071) and *Gavialis gangeticus* (TMM M-5490). A, E, I left lateral view; B, F, J left dorsal view; C, G, K right lateral view; D, H, L right dorsal view.

## 15. Supplementary References

1. J. M. Clark, X. Xu, C. A. Forster, Y. Wang, A Middle Jurassic 'sphenosuchian' from China and the origin of the crocodylian skull. *Nature* **430**, 1021–1024 (2004).
2. A. W. Crompton, K. K. Smith, "A new genus and species of crocodylian from the Kayenta Formation (Late Triassic?) of Northern Arizona" in *Aspects of Vertebrate History*, L. L. Jacobs, Eds. (Museum of Northern Arizona Press, Flagstaff, 1980) pp. 193–217.
3. E. H. Colbert, C. C. Mook, The Ancestral crocodylian *Protosuchus*. *Bull. Am. Mus. Nat. Hist.* **97**, 143–182 (1951).
4. F. Westphal, Die Krokodilier des Deutschen und Englischen oberen Lias. *Palaeontographica A* **116**, 23–118 (1962).
5. C. W. Andrews, Descriptive Catalogue of the Marine Reptiles of the Oxford Clay: Part II (British Museum (Natural History), London, 1913).
6. Y. Herrera, M. Fernández, J. A. Varela, Morfología del miembro anterior de *Geosaurus araucanensis* Gasparini y Dellapé, 1976 (Crocodyliformes: Thalattosuchia). *Ameghiniana* **46**, 657–667 (2009).
7. Y. Herrera, M. S. Fernández, Z. Gasparini, Postcranial skeleton of *Cricosaurus araucanensis* (Crocodyliformes: Thalattosuchia): morphology and palaeobiological insights. *Alcheringa* **37**, 1–14 (2013).
8. H. Karl, E. Gröning, C. Brauckmann, N. Knötschke, Revision of the genus *Enaliosuchus* Koken, 1883 (Archosauromorpha: Metriorhynchidae) from the

- Early Cretaceous of northwestern Germany. *Studia Geológica Salmanticensia* **42**, 49–59 (2006).
9. M. T. Young, M.B. Andrade, S. Etches, B. L. Beatty, A new metriorhynchid crocodylomorph from the Lower Kimmeridge Clay Formation (Late Jurassic) of England, with implications for the evolution of dermatocranium ornamentation in Geosaurini. *Zool. J. Linn. Soc.* **169**, 820–848 (2013).
  10. D. Pol, A. H. Turner, M. A. Norell, Morphology of the Late Cretaceous Crocodylomorph *Shamosuchus djadochtaensis* and a Discussion of Neosuchian Phylogeny as Related to the Origin of Eusuchia. *Bull. Am. Mus. Nat. Hist.* **324**, 1–103 (2009).
  11. G. Grigg, D. Kirshner, *Biology and Evolution of Crocodylians* (CSIRO and Cornell University Press, 2015).
  12. M. T. Young, *et al.*, Convergent evolution and possible constraint in the posterodorsal retraction of the external nares in pelagic crocodylomorphs. *Zool. J. Linn. Soc.* (In press).
  13. J. Ristevski, M. T. Young, M. B. Andrade, A. K. Hastings, A new species of *Anteophthalmosuchus* (Crocodylomorpha, Goniopholididae) from the Lower Cretaceous of the Isle of Wight, United Kingdom, and a review of the genus. *Cretac. Res.* **84**, 340–383 (2018).
  14. A. Ósi, M. T. Young, A. Galácz, M. Rabi, A new large-bodied thalattosuchian crocodyliform from the Lower Jurassic (Toarcian) of Hungary, with further evidence of the mosaic acquisition of marine adaptations in Metriorhynchoidea. *PeerJ* **6**, e4668 (2018).

15. D. Foffa, M. M. Johnson, M. T. Young, L. Steel, S. L. Brusatte, A revision of the deep-water teleosauroid crocodylomorph *Teleosaurus megarhinus* Hulke, 1871 from the Kimmeridge Clay Formation (Late Jurassic) of England, UK. *PeerJ* **7**, e6646 (2019).
16. M. M. Johnson, M. T. Young, S. L. Brusatte, Re-description of two contemporaneous mesorostrine teleosauroids (Crocodylomorpha, Thalattosuchia) from the Bathonian of England, and insights into the early evolution of Machimosaurini. *Zoo. J. Linn. Soc.* zlz037 (2019).
17. S. Sachs, M. T. Young, P. Abel, H. Mallison, A new species of *Cricosaurus* (Thalattosuchia, Metriorhynchidae) from the Upper Jurassic of southern Germany. *Acta Palaeontologica Polonica* **64**, 345–356 (2019).
18. E. W. Wilber, What's in an Outgroup? The Impact of Outgroup Choice on the Phylogenetic Position of Thalattosuchia (Crocodylomorpha) and the Origin of Crocodyliformes. *Syst. Biol.* **64**, 624–637 (2015a).
19. E. W. Wilber, A new metriorhynchoid (Crocodylomorpha, Thalattosuchia) from the Middle Jurassic of Oregon and the evolutionary timing of marine adaptations in thalattosuchian crocodylomorphs. *J. Vert. Paleo.* 902846 (2015b).
20. E. Buffetaut, Position systématique et phylogénétique du genre *Pelagosaurus* Bronn, 1841 (Crocodylia, Mesosuchia), du Toarcien d'Europe. *Geobios* **13**, 783–786 (1980).
21. J. R. Oaks, A time-calibrated species tree of crocodylia reveals a recent radiation of the true crocodiles. *Evolution* **65**, 3285–3297 (2011).



22. J. Harshman, C. J. Huddleston, J. P. Bollback, T. J. Parsons, M. J. Braun True and false gharials: a nuclear gene phylogeny of crocodylia. *Syst Biol* **52**, 386–402 (2003).
23. M. S. Y. Lee, A. M. Yates Tip-dating and homoplasy: reconciling the shallow molecular divergences of modern gharials with their long fossil record. *Proc. R. Soc. B* **285**, 20181071 (2018).
24. D. G. Cerio, L. M. Witmer, Intraspecific variation and symmetry of the inner-ear labyrinth in a population of wild turkeys: implications for paleontological reconstructions. *PeerJ* **7**, e7355 (2019).
